# Supplementary material for: The influence of potassium cation on a strong OHO hydrogen bond
Source: Royal Society of Chemistry journal article supplement (doi:10.1039/c0ob00763c), 2011-01-01
Supplement: c0ob00763c.pdf [file c0ob00763c.pdf]

Table 2. Electron densities at BCP ( a.u.) and sum of electron densities in the structures with optimized OH distances in O<sup>⋯</sup>O hydrogen bridge of 2.403(3) Å.

| Positions of K <sup>+</sup> | $\rho(r)_{\text{OH}(1)}$ | $\rho(r)_{\text{OH}(2)}$ | $\rho(r)_{\text{C=O}(1)}$ | $\rho(r)_{\text{C=O}(2)}$ | $\rho(r)_{\text{C-O}(1)}$ | $\rho(r)_{\text{C-O}(2)}$ | $\Sigma\rho(r)$ |
|-----------------------------|--------------------------|--------------------------|---------------------------|---------------------------|---------------------------|---------------------------|-----------------|
| 0                           | 0.1522                   | 0.2009                   | 0.4021                    | 0.3909                    | 0.3601                    | 0.3519                    | 2.7163          |
| 1                           | 0.1097                   | 0.2789                   | 0.3986                    | 0.3928                    | 0.3752                    | 0.3488                    | 2.7632          |
| 2                           | 0.1134                   | 0.2707                   | 0.3973                    | 0.3928                    | 0.3765                    | 0.3505                    | 2.7590          |
| 3                           | 0.1291                   | 0.2374                   | 0.4018                    | 0.3921                    | 0.3687                    | 0.3518                    | 2.7374          |
| 4                           | 0.2634                   | 0.1170                   | 0.4039                    | 0.3846                    | 0.3404                    | 0.3578                    | 2.7257          |
| 5                           | 0.2583                   | 0.1192                   | 0.4038                    | 0.3850                    | 0.3411                    | 0.3577                    | 2.7239          |
| 6                           | 0.2847                   | 0.1080                   | 0.4041                    | 0.3888                    | 0.3369                    | 0.3535                    | 2.7347          |
| 1,2                         | 0.1002                   | 0.3054                   | 0.3938                    | 0.3941                    | 0.3824                    | 0.3488                    | 2.7830          |
| 1,6                         | 0.2039                   | 0.1479                   | 0.4010                    | 0.3908                    | 0.3473                    | 0.3506                    | 2.7016          |
| 2,3                         | 0.1086                   | 0.2825                   | 0.3971                    | 0.3936                    | 0.3796                    | 0.3511                    | 2.7681          |
| 3,4                         | 0.2485                   | 0.1235                   | 0.4038                    | 0.3860                    | 0.3437                    | 0.3582                    | 2.7212          |
| 4,5                         | 0.2910                   | 0.1059                   | 0.4049                    | 0.3790                    | 0.3377                    | 0.3603                    | 2.7375          |
| 5,6                         | 0.3055                   | 0.1007                   | 0.4050                    | 0.3836                    | 0.3351                    | 0.3564                    | 2.7449          |
| 1,2,3                       | 0.0978                   | 0.3129                   | 0.3937                    | 0.3947                    | 0.3848                    | 0.3500                    | 2.7904          |
| 1,2,6                       | 0.1181                   | 0.2555                   | 0.3990                    | 0.3931                    | 0.3730                    | 0.3475                    | 2.7461          |
| 2,3,6                       | 0.2169                   | 0.1397                   | 0.3992                    | 0.3916                    | 0.3498                    | 0.3535                    | 2.7086          |
| 4,5,6                       | 0.3235                   | 0.0950                   | 0.4059                    | 0.3775                    | 0.3337                    | 0.3587                    | 2.7522          |
| 1,2,3,4,5,6                 | 0.2433                   | 0.1234                   | 0.3997                    | 0.3839                    | 0.3459                    | 0.3579                    | 2.7143          |

Table 3. Topological parameters in the structures with optimized OH distances in O<sup>⋯</sup>O hydrogen bridge of 2.403(3) Å: ellipticity at BCP ( $\epsilon(r)$ ), distance of BCP to the centre of the OH bond ( $d(\text{BCP})$  [Å]), electron kinetic energy density at BCP ( $G(r)$ ), electron potential energy density at BCP ( $V(r)$ ).

| Positions of K <sup>+</sup> | $\epsilon(r)_1$ | $\epsilon(r)_2$ | $d(\text{BCP})_1$ | $d(\text{BCP})_2$ | $G(r)_1$ | $G(r)_2$ | $V(r)_1$  | $V(r)_2$  |
|-----------------------------|-----------------|-----------------|-------------------|-------------------|----------|----------|-----------|-----------|
| 0                           | 0.0206          | 0.0174          | 0.1683            | 0.0891            | 12.8313  | 13.6354  | -32.7237  | -51.6497  |
| 1                           | 0.0269          | 0.0144          | 0.1590            | 0.0841            | 10.8768  | 14.0990  | -19.5367  | -89.4278  |
| 2                           | 0.0221          | 0.0140          | 0.1613            | 0.0853            | 11.0007  | 13.9322  | -20.5265  | -85.5352  |
| 3                           | 0.0218          | 0.0151          | 0.1651            | 0.0874            | 11.8193  | 13.5298  | -25.1070  | -68.3748  |
| 4                           | 0.0144          | 0.0244          | 0.1776            | 0.0939            | 13.8205  | 11.1797  | -81.7233  | -21.5303  |
| 5                           | 0.0146          | 0.0237          | 0.1774            | 0.0938            | 13.7210  | 11.2960  | -79.0417  | -22.1832  |
| 6                           | 0.0144          | 0.0307          | 0.1775            | 0.0939            | 14.5289  | 10.7069  | -93.0817  | -19.0312  |
| 1,2                         | 0.0258          | 0.0137          | 0.1548            | 0.0819            | 10.3428  | 15.4545  | -17.0586  | -104.0153 |
| 1,6                         | 0.0177          | 0.0242          | 0.1738            | 0.0919            | 13.6308  | 12.5919  | -53.5837  | -31.4742  |
| 2,3                         | 0.0214          | 0.0134          | 0.1596            | 0.0844            | 10.7314  | 14.3744  | -19.2348  | -91.9901  |
| 3,4                         | 0.0110          | 0.0220          | 0.1772            | 0.0937            | 13.5879  | 11.5331  | -74.0364  | -23.4995  |
| 4,5                         | 0.0138          | 0.0241          | 0.1774            | 0.0939            | 14.8364  | 10.6014  | -96.6303  | -18.5363  |
| 5,6                         | 0.0139          | 0.0308          | 0.1760            | 0.0931            | 15.6580  | 10.3244  | -104.4927 | -17.1358  |
| 1,2,3                       | 0.0251          | 0.0134          | 0.1534            | 0.0812            | 10.1913  | 15.9778  | -16.4479  | -108.3046 |
| 1,2,6                       | 0.0231          | 0.0158          | 0.1635            | 0.0865            | 11.3052  | 13.5680  | -22.1270  | -78.1291  |
| 2,3,6                       | 0.0142          | 0.0232          | 0.1756            | 0.0929            | 13.5451  | 12.3242  | -59.2593  | -28.7188  |
| 4,5,6                       | 0.0139          | 0.0303          | 0.1733            | 0.0917            | 16.8300  | 10.0368  | -114.1873 | -15.7564  |
| 1,2,3,4,5,6                 | 0.0133          | 0.0217          | 0.1793            | 0.0949            | 13.4502  | 11.5699  | -72.6886  | -23.8224  |

Table 4. Electron densities at BCP ( a.u.) and sum of electron densities in the structures with optimized OHO hydrogen bond.

| Positions of K <sup>+</sup> | $\rho(r)_{\text{OH}(1)}$ | $\rho(r)_{\text{OH}(2)}$ | $\rho(r)_{\text{C=O}(1)}$ | $\rho(r)_{\text{C=O}(2)}$ | $\rho(r)_{\text{C-O}(1)}$ | $\rho(r)_{\text{C-O}(2)}$ | $\Sigma\rho(r)$ |
|-----------------------------|--------------------------|--------------------------|---------------------------|---------------------------|---------------------------|---------------------------|-----------------|
| 0                           | 0.1547                   | 0.2143                   | 0.4017                    | 0.3909                    | 0.3498                    | 0.3518                    | 2.7218          |
| 1                           | 0.1004                   | 0.2876                   | 0.3986                    | 0.3929                    | 0.3580                    | 0.3487                    | 2.7447          |
| 2                           | 0.1149                   | 0.2721                   | 0.3972                    | 0.3928                    | 0.3724                    | 0.3506                    | 2.7578          |
| 3                           | 0.1373                   | 0.2412                   | 0.4016                    | 0.3921                    | 0.3600                    | 0.3519                    | 2.7407          |
| 4                           | 0.2620                   | 0.1184                   | 0.4038                    | 0.3846                    | 0.3367                    | 0.3578                    | 2.7219          |
| 5                           | 0.2560                   | 0.1222                   | 0.4037                    | 0.3851                    | 0.3376                    | 0.3576                    | 2.7210          |
| 6                           | 0.2870                   | 0.1044                   | 0.4041                    | 0.3887                    | 0.3309                    | 0.3537                    | 2.7272          |
| 1,2                         | 0.0875                   | 0.3103                   | 0.3940                    | 0.3942                    | 0.3740                    | 0.3487                    | 2.7659          |
| 1,6                         | 0.1749                   | 0.1768                   | 0.4005                    | 0.3911                    | 0.3403                    | 0.3496                    | 2.6933          |
| 2,3                         | 0.1103                   | 0.2829                   | 0.3971                    | 0.3936                    | 0.3791                    | 0.3512                    | 2.7698          |
| 3,4                         | 0.2429                   | 0.1308                   | 0.4036                    | 0.3861                    | 0.3438                    | 0.3580                    | 2.7228          |
| 4,5                         | 0.2930                   | 0.1026                   | 0.4049                    | 0.3790                    | 0.3354                    | 0.3640                    | 2.7375          |
| 5,6                         | 0.3078                   | 0.0953                   | 0.4051                    | 0.3836                    | 0.3308                    | 0.3566                    | 2.7376          |
| 1,2,3                       | 0.0864                   | 0.3155                   | 0.3939                    | 0.3948                    | 0.3800                    | 0.3495                    | 2.7757          |
| 1,2,6                       | 0.1121                   | 0.2613                   | 0.3958                    | 0.3932                    | 0.3659                    | 0.3474                    | 2.7351          |
| 2,3,6                       | 0.2052                   | 0.1542                   | 0.3997                    | 0.3917                    | 0.3564                    | 0.3530                    | 2.7185          |
| 4,5,6                       | 0.3251                   | 0.0875                   | 0.4059                    | 0.3774                    | 0.3306                    | 0.3589                    | 2.7429          |
| 1,2,3,4,5,6                 | 0.2485                   | 0.1172                   | 0.4000                    | 0.3839                    | 0.3515                    | 0.3581                    | 2.7193          |

Table 5. Topological parameters in the structures with optimized OHO hydrogen bridge: ellipticity at BCP ( $\epsilon(r)$ ), distance of BCP to the centre of the OH bond ( $d(\text{BCP})$  [Å]), electron kinetic energy density at BCP ( $G(r)$ ), electron potential energy density at BCP ( $V(r)$ ).

| Positions of $\text{K}^+$ | $\epsilon(r)_1$ | $\epsilon(r)_2$ | $d(\text{BCP})_1$ | $d(\text{BCP})_2$ | $G(r)_1$ | $G(r)_2$ | $V(r)_1$ | $V(r)_2$ |
|---------------------------|-----------------|-----------------|-------------------|-------------------|----------|----------|----------|----------|
| 0                         | 0.021           | 0.017           | 0.0879            | 0.0912            | 13.354   | 14.039   | -33.552  | -57.483  |
| 1                         | 0.030           | 0.014           | 0.0841            | 0.0939            | 9.887    | 14.399   | -16.988  | -94.489  |
| 2                         | 0.022           | 0.014           | 0.0855            | 0.0930            | 11.187   | 13.954   | -20.965  | -86.332  |
| 3                         | 0.021           | 0.015           | 0.0866            | 0.0927            | 12.662   | 13.892   | -27.680  | -70.239  |
| 4                         | 0.017           | 0.024           | 0.0938            | 0.0860            | 13.810   | 11.314   | -80.976  | -21.962  |
| 5                         | 0.015           | 0.023           | 0.0936            | 0.0864            | 13.747   | 11.559   | -77.768  | -23.061  |
| 6                         | 0.015           | 0.032           | 0.0937            | 0.0839            | 14.488   | 10.349   | -94.019  | -18.038  |
| 1,2                       | 0.029           | 0.014           | 0.0822            | 0.0929            | 8.836    | 15.490   | -13.861  | -106.813 |
| 1,6                       | 0.021           | 0.021           | 0.0902            | 0.0903            | 13.525   | 13.551   | -41.432  | -42.152  |
| 2,3                       | 0.021           | 0.013           | 0.0843            | 0.0942            | 10.929   | 14.457   | -19.695  | -92.236  |
| 3,4                       | 0.014           | 0.021           | 0.0933            | 0.0873            | 13.713   | 12.111   | -71.348  | -25.746  |
| 4,5                       | 0.014           | 0.025           | 0.0938            | 0.0837            | 14.815   | 10.259   | -97.525  | -17.641  |
| 5,6                       | 0.014           | 0.032           | 0.0928            | 0.0820            | 15.525   | 9.735    | -105.247 | -15.749  |
| 1,2,3                     | 0.028           | 0.013           | 0.0816            | 0.0925            | 8.807    | 15.837   | -13.615  | -109.663 |
| 1,2,6                     | 0.025           | 0.016           | 0.0864            | 0.0946            | 10.741   | 13.614   | -20.358  | -81.327  |
| 2,3,6                     | 0.014           | 0.022           | 0.0919            | 0.0892            | 13.810   | 13.100   | -54.103  | -33.685  |
| 4,5,6                     | 0.014           | 0.032           | 0.0912            | 0.0801            | 16.487   | 9.163    | -114.254 | -13.910  |
| 1,2,3,4,5,6               | 0.013           | 0.023           | 0.0954            | 0.0878            | 13.381   | 11.054   | -75.472  | -21.980  |

Table 6. Calculated electron densities at BCP ( a.u.) and sum of electron densities in the structures with the solid state geometry of the OHO hydrogen bond.

| Positions of K <sup>+</sup> | $\rho(r)_{\text{OH}(1)}$ | $\rho(r)_{\text{OH}(2)}$ | $\rho(r)_{\text{C=O}(1)}$ | $\rho(r)_{\text{C=O}(2)}$ | $\rho(r)_{\text{C-O}(1)}$ | $\rho(r)_{\text{C-O}(2)}$ | $\Sigma\rho(r)$ |
|-----------------------------|--------------------------|--------------------------|---------------------------|---------------------------|---------------------------|---------------------------|-----------------|
| 0                           | 0.1729                   | 0.1768                   | 0.4023                    | 0.3906                    | 0.3549                    | 0.3528                    | 2.7085          |
| 1                           | 0.1689                   | 0.1798                   | 0.3992                    | 0.3919                    | 0.3552                    | 0.3517                    | 2.7048          |
| 2                           | 0.1707                   | 0.1785                   | 0.398                     | 0.3919                    | 0.3581                    | 0.3532                    | 2.7086          |
| 3                           | 0.1722                   | 0.1774                   | 0.4023                    | 0.3915                    | 0.3563                    | 0.3537                    | 2.7116          |
| 4                           | 0.1747                   | 0.1743                   | 0.4034                    | 0.3855                    | 0.3547                    | 0.355                     | 2.7058          |
| 5                           | 0.1745                   | 0.1746                   | 0.4033                    | 0.3859                    | 0.3548                    | 0.3555                    | 2.7068          |
| 6                           | 0.176                    | 0.1723                   | 0.4035                    | 0.3896                    | 0.3532                    | 0.3505                    | 2.7032          |
| 1,2                         | 0.167                    | 0.1814                   | 0.3946                    | 0.393                     | 0.3584                    | 0.3522                    | 2.7047          |
| 1,6                         | 0.1718                   | 0.1751                   | 0.4007                    | 0.3911                    | 0.3537                    | 0.3495                    | 2.6999          |
| 2,3                         | 0.17                     | 0.1791                   | 0.3979                    | 0.3926                    | 0.3593                    | 0.3541                    | 2.7112          |
| 3,4                         | 0.174                    | 0.1748                   | 0.4033                    | 0.3868                    | 0.3561                    | 0.3563                    | 2.7095          |
| 4,5                         | 0.1763                   | 0.1722                   | 0.4043                    | 0.3803                    | 0.3546                    | 0.3578                    | 2.7037          |
| 5,6                         | 0.1776                   | 0.1705                   | 0.4044                    | 0.3847                    | 0.3532                    | 0.3533                    | 2.7018          |
| 1,2,3                       | 0.1664                   | 0.182                    | 0.3946                    | 0.3937                    | 0.3596                    | 0.3531                    | 2.7075          |
| 1,2,6                       | 0.1697                   | 0.1767                   | 0.3965                    | 0.3924                    | 0.3569                    | 0.3501                    | 2.7003          |
| 2,3,6                       | 0.1729                   | 0.1745                   | 0.3995                    | 0.392                     | 0.3579                    | 0.352                     | 2.7069          |
| 4,5,6                       | 0.1794                   | 0.1685                   | 0.4053                    | 0.3788                    | 0.3532                    | 0.3554                    | 2.6988          |
| 1,2,3,4,5,6                 | 0.1722                   | 0.1728                   | 0.3992                    | 0.3847                    | 0.3579                    | 0.3559                    | 2.7007          |

Table 7. Topological parameters in the structures with the solid state geometry of the OHO hydrogen bond: ellipticity at BCP ( $\epsilon(r)$ ), distance of BCP to the centre of the OH bond ( $d(\text{BCP})$  [ $\text{\AA}$ ]), electron kinetic energy density at BCP ( $G(r)$ ), electron potential energy density at BCP ( $V(r)$ ).

| Positions of $\text{K}^+$ | $\epsilon(r)_1$ | $\epsilon(r)_2$ | $d(\text{BCP})_1$ | $d(\text{BCP})_2$ | $G(r)_1$ | $G(r)_2$ | $V(r)_1$ | $V(r)_2$ |
|---------------------------|-----------------|-----------------|-------------------|-------------------|----------|----------|----------|----------|
| 0                         | 0.0190          | 0.0193          | 0.0901            | 0.0904            | 13.42575 | 13.40586 | -40.3439 | -41.769  |
| 1                         | 0.0194          | 0.0198          | 0.0896            | 0.0906            | 13.69503 | 13.10598 | -39.4313 | -42.5237 |
| 2                         | 0.0163          | 0.0188          | 0.0901            | 0.0907            | 13.58181 | 13.22073 | -39.9368 | -42.2323 |
| 3                         | 0.0178          | 0.0188          | 0.0901            | 0.0905            | 13.46859 | 13.34466 | -40.2    | -41.9199 |
| 4                         | 0.0187          | 0.0171          | 0.0967            | 0.0845            | 13.2192  | 13.57875 | -40.8424 | -41.2916 |
| 5                         | 0.0188          | 0.0171          | 0.0904            | 0.0905            | 13.23909 | 13.5558  | -40.7862 | -41.3478 |
| 6                         | 0.0196          | 0.0209          | 0.0905            | 0.0899            | 13.0968  | 13.68891 | -41.1653 | -41.0112 |
| 1,2                       | 0.0172          | 0.0197          | 0.0945            | 0.0907            | 13.84497 | 12.95757 | -39.0347 | -42.9098 |
| 1,6                       | 0.0199          | 0.0212          | 0.0905            | 0.0907            | 13.34007 | 13.3569  | -40.3053 | -41.5163 |
| 2,3                       | 0.0155          | 0.0184          | 0.0901            | 0.0908            | 13.62924 | 13.16106 | -39.7859 | -42.3727 |
| 3,4                       | 0.0179          | 0.0167          | 0.0906            | 0.0907            | 13.25898 | 13.51908 | -40.7125 | -41.4531 |
| 4,5                       | 0.0186          | 0.0154          | 0.0906            | 0.0904            | 13.05396 | 13.73328 | -41.2495 | -40.8529 |
| 5,6                       | 0.0195          | 0.0192          | 0.0905            | 0.0897            | 12.94839 | 13.83732 | -41.5373 | -40.2843 |
| 1,2,3                     | 0.0164          | 0.0191          | 0.0893            | 0.0907            | 13.89546 | 12.90861 | -38.8978 | -43.0326 |
| 1,2,6                     | 0.0177          | 0.0208          | 0.0900            | 0.0911            | 13.48542 | 13.18095 | -39.9087 | -41.9691 |
| 2,3,6                     | 0.0164          | 0.0199          | 0.0909            | 0.0907            | 13.28499 | 13.41657 | -40.6388 | -41.3689 |
| 4,5,6                     | 0.0194          | 0.0178          | 0.0904            | 0.0892            | 12.79998 | 14.01021 | -41.9129 | -39.7964 |
| 1,2,3,4,5,6               | 0.0165          | 0.0166          | 0.0952            | 0.0915            | 13.16106 | 13.41504 | -40.6985 | -41.2881 |
